# Supplementary material
Source: MDPI journal article supplement (https://www.mdpi.com/2227-9091/9/3/57)
Supplement: s1 [file s1]

<?xml version="1.0"?><Workbook xmlns="urn:schemas-microsoft-com:office:spreadsheet" xmlns:o="urn:schemas-microsoft-com:office:office" xmlns:x="urn:schemas-microsoft-com:office:excel" xmlns:ss="urn:schemas-microsoft-com:office:spreadsheet" xmlns:html="http://www.w3.org/TR/REC-html40"><!--\ NOTE: This file is compatible with Microsoft Excel version 2002 and above.\ If you have an earlier version then you must convert this file to a file format compatible with your Excel version.\ To do this, we would suggest that you do the following:\ - Download and install OpenOffice (http://download.openoffice.org/). This product is free and can coexist with Microsoft Office.\ - Save the extracted Excel file (as text file) to the disk. The default file extension '.xls' should be changed to '.xml'.\ - Use OpenOffice 'Calc' to open the saved Excel file by specifying the file type 'Microsoft Excel 2003 XML (*.xml)'.\ - Save the file to a new file with a type corresponding to your own version of Excel.\ "--><DocumentProperties xmlns="urn:schemas-microsoft-com:office:office"><Author>I.Stat</Author><Created>2020-12-08T19:24:57Z</Created><Company>ISTAT</Company><Version>10.6626</Version></DocumentProperties><Styles><Style ss:ID="Default" ss:Name="Normal" xmlns="urn:schemas-microsoft-com:office:spreadsheet"><Alignment ss:Vertical="Bottom" /><Borders /><Font /><Interior /><NumberFormat /><Protection /></Style><Style ss:ID="Cell" ss:Parent="Default" xmlns="urn:schemas-microsoft-com:office:spreadsheet"><Borders><Border ss:Position="Bottom" ss:LineStyle="Continuous" ss:Weight="1" ss:Color="#C0C0C0" /><Border ss:Position="Left" ss:LineStyle="Continuous" ss:Weight="1" ss:Color="#C0C0C0" /><Border ss:Position="Right" ss:LineStyle="Continuous" ss:Weight="1" ss:Color="#C0C0C0" /><Border ss:Position="Top" ss:LineStyle="Continuous" ss:Weight="1" ss:Color="#C0C0C0" /></Borders></Style><Style ss:ID="vdimension" ss:Parent="Cell" xmlns="urn:schemas-microsoft-com:office:spreadsheet"><Alignment ss:Vertical="Top" ss:WrapText="1" /><Font ss:FontName="Verdana" x:Family="Swiss" ss:Size="8" /><Interior ss:Color="#C4D8ED" ss:Pattern="Solid" /></Style><Style ss:ID="vdimensionwithlink" ss:Parent="vdimension" xmlns="urn:schemas-microsoft-com:office:spreadsheet"><Font ss:FontName="Verdana" x:Family="Swiss" ss:Size="8" ss:Underline="Single" /></Style><Style ss:ID="vdimensionname" ss:Parent="vdimension" xmlns="urn:schemas-microsoft-com:office:spreadsheet"><Alignment ss:Vertical="Bottom" ss:WrapText="1" /><Font ss:FontName="Verdana" x:Family="Swiss" ss:Size="8" ss:Bold="1" /></Style><Style ss:ID="vdimensionnamewithlink" ss:Parent="vdimensionname" xmlns="urn:schemas-microsoft-com:office:spreadsheet"><Font ss:FontName="Verdana" x:Family="Swiss" ss:Size="8" ss:Bold="1" ss:Underline="Single" /></Style><Style ss:ID="hdimension" ss:Parent="Cell" xmlns="urn:schemas-microsoft-com:office:spreadsheet"><Alignment ss:Horizontal="Center" ss:Vertical="Top" ss:WrapText="1" /><Font ss:FontName="Verdana" x:Family="Swiss" ss:Size="8" ss:Color="#FFFFFF" /><Interior ss:Color="#00A1E3" ss:Pattern="Solid" /></Style><Style ss:ID="hdimensionwithlink" ss:Parent="hdimension" xmlns="urn:schemas-microsoft-com:office:spreadsheet"><Font ss:FontName="Verdana" x:Family="Swiss" ss:Size="8" ss:Color="#FFFFFF" ss:Underline="Single" /></Style><Style ss:ID="hdimensionname" ss:Parent="hdimension" xmlns="urn:schemas-microsoft-com:office:spreadsheet"><Alignment ss:Horizontal="Right" ss:Vertical="Center" ss:WrapText="1" /><Font ss:FontName="Verdana" x:Family="Swiss" ss:Size="8" ss:Color="#FFFFFF" ss:Bold="1" /></Style><Style ss:ID="hdimensionnamewithlink" ss:Parent="hdimensionname" xmlns="urn:schemas-microsoft-com:office:spreadsheet"><Font ss:FontName="Verdana" x:Family="Swiss" ss:Size="8" ss:Color="#FFFFFF" ss:Underline="Single" ss:Bold="1" /></Style><Style ss:ID="pdimension" ss:Parent="Cell" xmlns="urn:schemas-microsoft-com:office:spreadsheet"><Alignment ss:Vertical="Top" ss:WrapText="1" /><Font ss:FontName="Verdana" x:Family="Swiss" ss:Size="8" ss:Color="#FFFFFF" /><Interior ss:Color="#2973BD" ss:Pattern="Solid" /></Style><Style ss:ID="pdimensionwithlink" ss:Parent="pdimension" xmlns="urn:schemas-microsoft-com:office:spreadsheet"><Font ss:FontName="Verdana" x:Family="Swiss" ss:Size="8" ss:Color="#FFFFFF" ss:Underline="Single" /></Style><Style ss:ID="pdimensionname" ss:Parent="pdimension" xmlns="urn:schemas-microsoft-com:office:spreadsheet"><Alignment ss:Horizontal="Right" ss:Vertical="Top" ss:WrapText="1" /><Font ss:FontName="Verdana" x:Family="Swiss" ss:Size="8" ss:Color="#FFFFFF" ss:Bold="1" /></Style><Style ss:ID="pdimensionnamewithlink" ss:Parent="pdimensionname" xmlns="urn:schemas-microsoft-com:office:spreadsheet"><Alignment ss:Horizontal="Right" ss:Vertical="Top" ss:WrapText="1" /><Font ss:FontName="Verdana" x:Family="Swiss" ss:Size="8" ss:Color="#FFFFFF" ss:Bold="1" ss:Underline="Single" /></Style><Style ss:ID="data" ss:Parent="Cell" xmlns="urn:schemas-microsoft-com:office:spreadsheet"><Alignment ss:Horizontal="Right" ss:Vertical="Bottom" /><Font x:Family="Swiss" ss:Size="8" /><NumberFormat /></Style><Style ss:ID="datawithlink" ss:Parent="data" xmlns="urn:schemas-microsoft-com:office:spreadsheet"><Font x:Family="Swiss" ss:Size="8" ss:Underline="Single" /></Style><Style ss:ID="datawithflag" ss:Parent="data" xmlns="urn:schemas-microsoft-com:office:spreadsheet"><Borders><Border ss:Position="Bottom" ss:LineStyle="Continuous" ss:Weight="1" ss:Color="#C0C0C0" /><Border ss:Position="Left" ss:LineStyle="Continuous" ss:Weight="0" ss:Color="#FFFFCC" /><Border ss:Position="Right" ss:LineStyle="Continuous" ss:Weight="1" ss:Color="#C0C0C0" /><Border ss:Position="Top" ss:LineStyle="Continuous" ss:Weight="1" ss:Color="#C0C0C0" /></Borders></Style><Style ss:ID="datawithlinkwithflag" ss:Parent="datawithlink" xmlns="urn:schemas-microsoft-com:office:spreadsheet"><Borders><Border ss:Position="Bottom" ss:LineStyle="Continuous" ss:Weight="1" ss:Color="#C0C0C0" /><Border ss:Position="Left" ss:LineStyle="Continuous" ss:Weight="0" ss:Color="#FFFFCC" /><Border ss:Position="Right" ss:LineStyle="Continuous" ss:Weight="1" ss:Color="#C0C0C0" /><Border ss:Position="Top" ss:LineStyle="Continuous" ss:Weight="1" ss:Color="#C0C0C0" /></Borders></Style><Style ss:ID="data2" ss:Parent="data" xmlns="urn:schemas-microsoft-com:office:spreadsheet"><Interior ss:Color="#F0F8FF" ss:Pattern="Solid" /></Style><Style ss:ID="data2withlink" ss:Parent="datawithlink" xmlns="urn:schemas-microsoft-com:office:spreadsheet"><Interior ss:Color="#F0F8FF" ss:Pattern="Solid" /></Style><Style ss:ID="data2withflag" ss:Parent="datawithflag" xmlns="urn:schemas-microsoft-com:office:spreadsheet"><Interior ss:Color="#F0F8FF" ss:Pattern="Solid" /></Style><Style ss:ID="data2withlinkwithflag" ss:Parent="datawithlinkwithflag" xmlns="urn:schemas-microsoft-com:office:spreadsheet"><Interior ss:Color="#F0F8FF" ss:Pattern="Solid" /></Style><Style ss:ID="flag" ss:Parent="Cell" xmlns="urn:schemas-microsoft-com:office:spreadsheet"><Alignment ss:Horizontal="Left" ss:Vertical="Bottom" ss:WrapText="1" /><Borders><Border ss:Position="Bottom" ss:LineStyle="Continuous" ss:Weight="1" ss:Color="#C0C0C0" /><Border ss:Position="Left" ss:LineStyle="Continuous" ss:Weight="1" ss:Color="#C0C0C0" /><Border ss:Position="Right" ss:LineStyle="Continuous" ss:Weight="0" ss:Color="#FFFFCC" /><Border ss:Position="Top" ss:LineStyle="Continuous" ss:Weight="1" ss:Color="#C0C0C0" /></Borders><Font ss:FontName="Verdana" x:Family="Swiss" ss:Size="10" ss:VerticalAlign="Superscript" /></Style><Style ss:ID="flag2" ss:Parent="flag" xmlns="urn:schemas-microsoft-com:office:spreadsheet"><Interior ss:Color="#FFFFCC" ss:Pattern="Solid" /></Style><Style ss:ID="flaglegendtitle" ss:Parent="Default" xmlns="urn:schemas-microsoft-com:office:spreadsheet"><Alignment ss:Horizontal="Left" ss:Vertical="Bottom" /><Font ss:FontName="Verdana" x:Family="Swiss" ss:Size="8" /></Style><Style ss:ID="flagdescription" ss:Parent="Default" xmlns="urn:schemas-microsoft-com:office:spreadsheet"><Alignment ss:Horizontal="Left" ss:Vertical="Bottom" /><Font ss:FontName="Verdana" x:Family="Swiss" ss:Size="8" /></Style><Style ss:ID="flagcode" ss:Parent="flagdescription" xmlns="urn:schemas-microsoft-com:office:spreadsheet"><Font ss:FontName="Verdana" x:Family="Swiss" ss:Size="8" ss:Bold="1" /></Style><Style ss:ID="ReportingYearStartDay" ss:Parent="Default" xmlns="urn:schemas-microsoft-com:office:spreadsheet"><Alignment ss:Horizontal="Left" ss:Vertical="Bottom" /><Font ss:FontName="Verdana" x:Family="Swiss" ss:Size="8" /></Style><Style ss:ID="powerexpression" ss:Parent="Default" xmlns="urn:schemas-microsoft-com:office:spreadsheet"><Alignment ss:Horizontal="Left" ss:Vertical="Bottom" /><Font ss:FontName="Verdana" x:Family="Swiss" ss:Size="8" /></Style><Style ss:ID="datasetname" ss:Parent="Cell" xmlns="urn:schemas-microsoft-com:office:spreadsheet"><Alignment ss:Horizontal="Left" ss:Vertical="Bottom" ss:WrapText="1" /><Font ss:FontName="Verdana" x:Family="Swiss" ss:Size="9" ss:Color="#000080" ss:Bold="1" /></Style><Style ss:ID="datasetnamewithlink" ss:Parent="datasetname" xmlns="urn:schemas-microsoft-com:office:spreadsheet"><Font ss:FontName="Verdana" x:Family="Swiss" ss:Size="9" ss:Color="#000080" ss:Bold="1" ss:Underline="Single" /></Style><Style ss:ID="siblingmd" ss:Parent="Cell" xmlns="urn:schemas-microsoft-com:office:spreadsheet"><Alignment ss:Horizontal="Center" ss:Vertical="Bottom" /><Font ss:FontName="Courier New" x:Family="Modern" ss:Size="9" ss:Color="#FF0000" ss:Bold="1" /><Interior ss:Color="#FFFFFF" ss:Pattern="Gray50" ss:PatternColor="#C0C0C0" /></Style><Style ss:ID="extractionwithlink" ss:Parent="Default" xmlns="urn:schemas-microsoft-com:office:spreadsheet"><Alignment ss:Horizontal="Left" ss:Vertical="Bottom" /><Font ss:FontName="Verdana" x:Family="Swiss" ss:Size="8" ss:Underline="Single" /></Style><Style ss:ID="refreshformula" ss:Parent="Cell" xmlns="urn:schemas-microsoft-com:office:spreadsheet"><Font ss:FontName="Arial" x:Family="Swiss" ss:Size="8" /></Style><Style ss:ID="timestamp" ss:Parent="Cell" xmlns="urn:schemas-microsoft-com:office:spreadsheet"><Font ss:FontName="Arial" x:Family="Swiss" ss:Size="8" /></Style><Style ss:ID="timeseriesiddata" ss:Parent="Cell" xmlns="urn:schemas-microsoft-com:office:spreadsheet"><Alignment ss:Horizontal="Left" ss:Vertical="Bottom" ss:WrapText="1" /><Font ss:FontName="Verdana" x:Family="Swiss" ss:Size="8" ss:Color="#000080" ss:Bold="0" /></Style><Style ss:ID="timeseriesiddatawithlink" ss:Parent="datasetname" xmlns="urn:schemas-microsoft-com:office:spreadsheet"><Font ss:FontName="Verdana" x:Family="Swiss" ss:Size="8" ss:Color="#000080" ss:Bold="0" ss:Underline="Single" /></Style></Styles><Worksheet ss:Name="I.Stat export"><Table ss:ExpandedColumnCount="17" ss:ExpandedRowCount="34" x:FullColumns="1" x:FullRows="1"><Column ss:Index="1" ss:AutoFitWidth="0" ss:Width="144" /><Column ss:Index="2" ss:AutoFitWidth="0" ss:Width="13" /><Row ss:Hidden="1"><Cell ss:StyleID="refreshformula" ss:Formula="=DotStatQuery(RC[1])"><Data ss:Type="String">Refresh</Data></Cell><Cell ss:Index="2" ss:StyleID="refreshformula"><Data ss:Type="String">&lt;?xml version="1.0"?&gt;&lt;WebTableParameter xmlns:xsd="http://www.w3.org/2001/XMLSchema" xmlns:xsi="http://www.w3.org/2001/XMLSchema-instance" xmlns=""&gt;&lt;DataTable Code="DCIS_MORTALITA1" HasMetadata="true"&gt;&lt;Name LocaleIsoCode="en"&gt;Life tables&lt;/Name&gt;&lt;Name LocaleIsoCode="it"&gt;Tavole di mortalità&lt;/Name&gt;&lt;Dimension Code="ITTER107" CommonCode="ITTER107" Display="labels"&gt;&lt;Name LocaleIsoCode="en"&gt;Territory&lt;/Name&gt;&lt;Name LocaleIsoCode="it"&gt;Territorio&lt;/Name&gt;&lt;Member Code="IT" HasOnlyUnitMetadata="false"&gt;&lt;Name LocaleIsoCode="en"&gt;Italy&lt;/Name&gt;&lt;Name LocaleIsoCode="it"&gt;Italia&lt;/Name&gt;&lt;ChildMember Code="ITC" HasOnlyUnitMetadata="false"&gt;&lt;Name LocaleIsoCode="en"&gt;Nord-ovest&lt;/Name&gt;&lt;Name LocaleIsoCode="it"&gt;Nord-ovest&lt;/Name&gt;&lt;/ChildMember&gt;&lt;ChildMember Code="ITD" HasOnlyUnitMetadata="false"&gt;&lt;Name LocaleIsoCode="en"&gt;Nord-est&lt;/Name&gt;&lt;Name LocaleIsoCode="it"&gt;Nord-est&lt;/Name&gt;&lt;/ChildMember&gt;&lt;ChildMember Code="ITE" HasOnlyUnitMetadata="false"&gt;&lt;Name LocaleIsoCode="en"&gt;Centro (I)&lt;/Name&gt;&lt;Name LocaleIsoCode="it"&gt;Centro&lt;/Name&gt;&lt;/ChildMember&gt;&lt;ChildMember Code="ITFG" HasOnlyUnitMetadata="false"&gt;&lt;Name LocaleIsoCode="en"&gt;Mezzogiorno&lt;/Name&gt;&lt;Name LocaleIsoCode="it"&gt;Mezzogiorno&lt;/Name&gt;&lt;/ChildMember&gt;&lt;/Member&gt;&lt;/Dimension&gt;&lt;Dimension Code="TIPO_DATO15" CommonCode="TIPO_DATO15" Display="labels"&gt;&lt;Name LocaleIsoCode="en"&gt;Biometric functions&lt;/Name&gt;&lt;Name LocaleIsoCode="it"&gt;Funzioni biometriche&lt;/Name&gt;&lt;Member Code="LIFEXP" HasOnlyUnitMetadata="false"&gt;&lt;Name LocaleIsoCode="en"&gt;life expectancy - ex&lt;/Name&gt;&lt;Name LocaleIsoCode="it"&gt;speranza di vita - ex&lt;/Name&gt;&lt;/Member&gt;&lt;/Dimension&gt;&lt;Dimension Code="SEXISTAT1" CommonCode="SEXISTAT1" Display="labels"&gt;&lt;Name LocaleIsoCode="en"&gt;Gender&lt;/Name&gt;&lt;Name LocaleIsoCode="it"&gt;Sesso&lt;/Name&gt;&lt;Member Code="1"&gt;&lt;Name LocaleIsoCode="en"&gt;males&lt;/Name&gt;&lt;Name LocaleIsoCode="it"&gt;maschi&lt;/Name&gt;&lt;/Member&gt;&lt;Member Code="2"&gt;&lt;Name LocaleIsoCode="en"&gt;females&lt;/Name&gt;&lt;Name LocaleIsoCode="it"&gt;femmine&lt;/Name&gt;&lt;/Member&gt;&lt;Member Code="9" IsDisplayed="true"&gt;&lt;Name LocaleIsoCode="en"&gt;total&lt;/Name&gt;&lt;Name LocaleIsoCode="it"&gt;totale&lt;/Name&gt;&lt;/Member&gt;&lt;/Dimension&gt;&lt;Dimension Code="ETA1" CommonCode="ETA1" Display="labels"&gt;&lt;Name LocaleIsoCode="en"&gt;Age and age class&lt;/Name&gt;&lt;Name LocaleIsoCode="it"&gt;Età e classi di età&lt;/Name&gt;&lt;Member Code="Y65"&gt;&lt;Name LocaleIsoCode="en"&gt;65 years&lt;/Name&gt;&lt;Name LocaleIsoCode="it"&gt;65 anni&lt;/Name&gt;&lt;/Member&gt;&lt;/Dimension&gt;&lt;Dimension Code="TIME" CommonCode="TIME" Display="labels"&gt;&lt;Name LocaleIsoCode="en"&gt;Select time&lt;/Name&gt;&lt;Name LocaleIsoCode="it"&gt;Seleziona periodo&lt;/Name&gt;&lt;Member Code="1995"&gt;&lt;Name LocaleIsoCode="en"&gt;1995&lt;/Name&gt;&lt;Name LocaleIsoCode="it"&gt;1995&lt;/Name&gt;&lt;/Member&gt;&lt;Member Code="1996"&gt;&lt;Name LocaleIsoCode="en"&gt;1996&lt;/Name&gt;&lt;Name LocaleIsoCode="it"&gt;1996&lt;/Name&gt;&lt;/Member&gt;&lt;Member Code="1997"&gt;&lt;Name LocaleIsoCode="en"&gt;1997&lt;/Name&gt;&lt;Name LocaleIsoCode="it"&gt;1997&lt;/Name&gt;&lt;/Member&gt;&lt;Member Code="1998"&gt;&lt;Name LocaleIsoCode="en"&gt;1998&lt;/Name&gt;&lt;Name LocaleIsoCode="it"&gt;1998&lt;/Name&gt;&lt;/Member&gt;&lt;Member Code="1999"&gt;&lt;Name LocaleIsoCode="en"&gt;1999&lt;/Name&gt;&lt;Name LocaleIsoCode="it"&gt;1999&lt;/Name&gt;&lt;/Member&gt;&lt;Member Code="2000"&gt;&lt;Name LocaleIsoCode="en"&gt;2000&lt;/Name&gt;&lt;Name LocaleIsoCode="it"&gt;2000&lt;/Name&gt;&lt;/Member&gt;&lt;Member Code="2001"&gt;&lt;Name LocaleIsoCode="en"&gt;2001&lt;/Name&gt;&lt;Name LocaleIsoCode="it"&gt;2001&lt;/Name&gt;&lt;/Member&gt;&lt;Member Code="2002"&gt;&lt;Name LocaleIsoCode="en"&gt;2002&lt;/Name&gt;&lt;Name LocaleIsoCode="it"&gt;2002&lt;/Name&gt;&lt;/Member&gt;&lt;Member Code="2003"&gt;&lt;Name LocaleIsoCode="en"&gt;2003&lt;/Name&gt;&lt;Name LocaleIsoCode="it"&gt;2003&lt;/Name&gt;&lt;/Member&gt;&lt;Member Code="2004"&gt;&lt;Name LocaleIsoCode="en"&gt;2004&lt;/Name&gt;&lt;Name LocaleIsoCode="it"&gt;2004&lt;/Name&gt;&lt;/Member&gt;&lt;Member Code="2005"&gt;&lt;Name LocaleIsoCode="en"&gt;2005&lt;/Name&gt;&lt;Name LocaleIsoCode="it"&gt;2005&lt;/Name&gt;&lt;/Member&gt;&lt;Member Code="2006"&gt;&lt;Name LocaleIsoCode="en"&gt;2006&lt;/Name&gt;&lt;Name LocaleIsoCode="it"&gt;2006&lt;/Name&gt;&lt;/Member&gt;&lt;Member Code="2007"&gt;&lt;Name LocaleIsoCode="en"&gt;2007&lt;/Name&gt;&lt;Name LocaleIsoCode="it"&gt;2007&lt;/Name&gt;&lt;/Member&gt;&lt;Member Code="2008"&gt;&lt;Name LocaleIsoCode="en"&gt;2008&lt;/Name&gt;&lt;Name LocaleIsoCode="it"&gt;2008&lt;/Name&gt;&lt;/Member&gt;&lt;Member Code="2009"&gt;&lt;Name LocaleIsoCode="en"&gt;2009&lt;/Name&gt;&lt;Name LocaleIsoCode="it"&gt;2009&lt;/Name&gt;&lt;/Member&gt;&lt;Member Code="2010"&gt;&lt;Name LocaleIsoCode="en"&gt;2010&lt;/Name&gt;&lt;Name LocaleIsoCode="it"&gt;2010&lt;/Name&gt;&lt;/Member&gt;&lt;Member Code="2011"&gt;&lt;Name LocaleIsoCode="en"&gt;2011&lt;/Name&gt;&lt;Name LocaleIsoCode="it"&gt;2011&lt;/Name&gt;&lt;/Member&gt;&lt;Member Code="2012"&gt;&lt;Name LocaleIsoCode="en"&gt;2012&lt;/Name&gt;&lt;Name LocaleIsoCode="it"&gt;2012&lt;/Name&gt;&lt;/Member&gt;&lt;Member Code="2013"&gt;&lt;Name LocaleIsoCode="en"&gt;2013&lt;/Name&gt;&lt;Name LocaleIsoCode="it"&gt;2013&lt;/Name&gt;&lt;/Member&gt;&lt;Member Code="2014"&gt;&lt;Name LocaleIsoCode="en"&gt;2014&lt;/Name&gt;&lt;Name LocaleIsoCode="it"&gt;2014&lt;/Name&gt;&lt;/Member&gt;&lt;Member Code="2015"&gt;&lt;Name LocaleIsoCode="en"&gt;2015&lt;/Name&gt;&lt;Name LocaleIsoCode="it"&gt;2015&lt;/Name&gt;&lt;/Member&gt;&lt;Member Code="2016"&gt;&lt;Name LocaleIsoCode="en"&gt;2016&lt;/Name&gt;&lt;Name LocaleIsoCode="it"&gt;2016&lt;/Name&gt;&lt;/Member&gt;&lt;Member Code="2017"&gt;&lt;Name LocaleIsoCode="en"&gt;2017&lt;/Name&gt;&lt;Name LocaleIsoCode="it"&gt;2017&lt;/Name&gt;&lt;/Member&gt;&lt;Member Code="2018"&gt;&lt;Name LocaleIsoCode="en"&gt;2018&lt;/Name&gt;&lt;Name LocaleIsoCode="it"&gt;2018&lt;/Name&gt;&lt;/Member&gt;&lt;Member Code="2019"&gt;&lt;Name LocaleIsoCode="en"&gt;2019&lt;/Name&gt;&lt;Name LocaleIsoCode="it"&gt;2019&lt;/Name&gt;&lt;/Member&gt;&lt;/Dimension&gt;&lt;WBOSInformations&gt;&lt;TimeDimension WebTreeWasUsed="false"&gt;&lt;StartCodes Annual="1995" /&gt;&lt;EndCodes Annual="2019" /&gt;&lt;/TimeDimension&gt;&lt;/WBOSInformations&gt;&lt;Tabulation Axis="horizontal"&gt;&lt;Dimension Code="SEXISTAT1" /&gt;&lt;Dimension Code="ITTER107" /&gt;&lt;/Tabulation&gt;&lt;Tabulation Axis="vertical"&gt;&lt;Dimension Code="TIME" /&gt;&lt;/Tabulation&gt;&lt;Tabulation Axis="page"&gt;&lt;Dimension Code="TIPO_DATO15" /&gt;&lt;Dimension Code="ETA1" /&gt;&lt;/Tabulation&gt;&lt;Formatting&gt;&lt;Labels LocaleIsoCode="it" /&gt;&lt;Power&gt;0&lt;/Power&gt;&lt;Decimals&gt;-1&lt;/Decimals&gt;&lt;SkipEmptyLines&gt;false&lt;/SkipEmptyLines&gt;&lt;SkipEmptyCols&gt;false&lt;/SkipEmptyCols&gt;&lt;SkipLineHierarchy&gt;true&lt;/SkipLineHierarchy&gt;&lt;SkipColHierarchy&gt;false&lt;/SkipColHierarchy&gt;&lt;Page&gt;1&lt;/Page&gt;&lt;/Formatting&gt;&lt;/DataTable&gt;&lt;Format&gt;&lt;ShowEmptyAxes&gt;true&lt;/ShowEmptyAxes&gt;&lt;Page&gt;1&lt;/Page&gt;&lt;EnableSort&gt;true&lt;/EnableSort&gt;&lt;IncludeFlagColumn&gt;false&lt;/IncludeFlagColumn&gt;&lt;IncludeTimeSeriesId&gt;false&lt;/IncludeTimeSeriesId&gt;&lt;DoBarChart&gt;false&lt;/DoBarChart&gt;&lt;FreezePanes&gt;true&lt;/FreezePanes&gt;&lt;MaxBarChartLen&gt;65&lt;/MaxBarChartLen&gt;&lt;/Format&gt;&lt;Query&gt;&lt;Name LocaleIsoCode="it"&gt;Singole età&lt;/Name&gt;&lt;AbsoluteUri&gt;http://dati.istat.it//View.aspx?QueryId=19053&amp;amp;QueryType=Public&amp;amp;Lang=it&lt;/AbsoluteUri&gt;&lt;/Query&gt;&lt;/WebTableParameter&gt;</Data></Cell></Row><Row><Cell ss:StyleID="datasetnamewithlink" ss:HRef="http://dati.istat.it/OECDStat_Metadata/ShowMetadata.ashx?Dataset=DCIS_MORTALITA1&amp;ShowOnWeb=true&amp;Lang=it" x:HRefScreenTip="Click once to display linked information. Click and hold to select this cell."><Data ss:Type="String">Dataset:Tavole di mortalità</Data></Cell></Row><Row CodeDim="TIPO_DATO15"><Cell ss:MergeAcross="1" ss:StyleID="pdimensionname"><Data ss:Type="String">Funzioni biometriche</Data></Cell><Cell ss:Index="3" ss:StyleID="pdimension" ss:MergeAcross="14"><Data ss:Type="String">speranza di vita - ex</Data></Cell></Row><Row CodeDim="ETA1"><Cell ss:MergeAcross="1" ss:StyleID="pdimensionname"><Data ss:Type="String">Età e classi di età</Data></Cell><Cell ss:Index="3" ss:StyleID="pdimension" ss:MergeAcross="14"><Data ss:Type="String">65 anni</Data></Cell></Row><Row><Cell ss:MergeAcross="1" ss:StyleID="hdimensionname"><Data ss:Type="String">Sesso</Data></Cell><Cell ss:Index="3" ss:MergeAcross="4" ss:StyleID="hdimension"><Data ss:Type="String">maschi</Data></Cell><Cell ss:Index="8" ss:MergeAcross="4" ss:StyleID="hdimension"><Data ss:Type="String">femmine</Data></Cell><Cell ss:Index="13" ss:MergeAcross="4" ss:StyleID="hdimension"><Data ss:Type="String">totale</Data></Cell></Row><Row><Cell ss:MergeAcross="1" ss:MergeDown="1" ss:StyleID="hdimensionname"><Data ss:Type="String">Territorio</Data></Cell><Cell ss:Index="3" ss:MergeDown="1" ss:StyleID="hdimension"><Data ss:Type="String">Italia</Data></Cell><Cell ss:Index="4" ss:MergeAcross="3" ss:StyleID="hdimension"><Data ss:Type="String">Italia</Data></Cell><Cell ss:Index="8" ss:MergeDown="1" ss:StyleID="hdimension"><Data ss:Type="String">Italia</Data></Cell><Cell ss:Index="9" ss:MergeAcross="3" ss:StyleID="hdimension"><Data ss:Type="String">Italia</Data></Cell><Cell ss:Index="13" ss:MergeDown="1" ss:StyleID="hdimension"><Data ss:Type="String">Italia</Data></Cell><Cell ss:Index="14" ss:MergeAcross="3" ss:StyleID="hdimension"><Data ss:Type="String">Italia</Data></Cell></Row><Row><Cell ss:Index="4" ss:StyleID="hdimension"><Data ss:Type="String">Nord-ovest</Data></Cell><Cell ss:Index="5" ss:StyleID="hdimension"><Data ss:Type="String">Nord-est</Data></Cell><Cell ss:Index="6" ss:StyleID="hdimension"><Data ss:Type="String">Centro</Data></Cell><Cell ss:Index="7" ss:StyleID="hdimension"><Data ss:Type="String">Mezzogiorno</Data></Cell><Cell ss:Index="9" ss:StyleID="hdimension"><Data ss:Type="String">Nord-ovest</Data></Cell><Cell ss:Index="10" ss:StyleID="hdimension"><Data ss:Type="String">Nord-est</Data></Cell><Cell ss:Index="11" ss:StyleID="hdimension"><Data ss:Type="String">Centro</Data></Cell><Cell ss:Index="12" ss:StyleID="hdimension"><Data ss:Type="String">Mezzogiorno</Data></Cell><Cell ss:Index="14" ss:StyleID="hdimension"><Data ss:Type="String">Nord-ovest</Data></Cell><Cell ss:Index="15" ss:StyleID="hdimension"><Data ss:Type="String">Nord-est</Data></Cell><Cell ss:Index="16" ss:StyleID="hdimension"><Data ss:Type="String">Centro</Data></Cell><Cell ss:Index="17" ss:StyleID="hdimension"><Data ss:Type="String">Mezzogiorno</Data></Cell></Row><Row><Cell ss:StyleID="vdimensionname"><Data ss:Type="String">Seleziona periodo</Data></Cell><Cell ss:Index="2" ss:StyleID="siblingmd"><Data ss:Type="String"></Data></Cell><Cell ss:Index="3" ss:StyleID="siblingmd"><Data ss:Type="String"></Data></Cell><Cell ss:Index="4" ss:StyleID="siblingmd"><Data ss:Type="String"></Data></Cell><Cell ss:Index="5" ss:StyleID="siblingmd"><Data ss:Type="String"></Data></Cell><Cell ss:Index="6" ss:StyleID="siblingmd"><Data ss:Type="String"></Data></Cell><Cell ss:Index="7" ss:StyleID="siblingmd"><Data ss:Type="String"></Data></Cell><Cell ss:Index="8" ss:StyleID="siblingmd"><Data ss:Type="String"></Data></Cell><Cell ss:Index="9" ss:StyleID="siblingmd"><Data ss:Type="String"></Data></Cell><Cell ss:Index="10" ss:StyleID="siblingmd"><Data ss:Type="String"></Data></Cell><Cell ss:Index="11" ss:StyleID="siblingmd"><Data ss:Type="String"></Data></Cell><Cell ss:Index="12" ss:StyleID="siblingmd"><Data ss:Type="String"></Data></Cell><Cell ss:Index="13" ss:StyleID="siblingmd"><Data ss:Type="String"></Data></Cell><Cell ss:Index="14" ss:StyleID="siblingmd"><Data ss:Type="String"></Data></Cell><Cell ss:Index="15" ss:StyleID="siblingmd"><Data ss:Type="String"></Data></Cell><Cell ss:Index="16" ss:StyleID="siblingmd"><Data ss:Type="String"></Data></Cell><Cell ss:Index="17" ss:StyleID="siblingmd"><Data ss:Type="String"></Data></Cell></Row><Row><Cell ss:StyleID="vdimension"><Data ss:Type="String">1995</Data></Cell><Cell ss:Index="2" ss:StyleID="siblingmd"><Data ss:Type="String"></Data></Cell><Cell ss:Index="3" ss:StyleID="data"><Data ss:Type="Number">15.709</Data></Cell><Cell ss:Index="4" ss:StyleID="data"><Data ss:Type="Number">15.329</Data></Cell><Cell ss:Index="5" ss:StyleID="data"><Data ss:Type="Number">15.805</Data></Cell><Cell ss:Index="6" ss:StyleID="data"><Data ss:Type="Number">15.986</Data></Cell><Cell ss:Index="7" ss:StyleID="data"><Data ss:Type="Number">15.794</Data></Cell><Cell ss:Index="8" ss:StyleID="data"><Data ss:Type="Number">19.593</Data></Cell><Cell ss:Index="9" ss:StyleID="data"><Data ss:Type="Number">19.649</Data></Cell><Cell ss:Index="10" ss:StyleID="data"><Data ss:Type="Number">20.253</Data></Cell><Cell ss:Index="11" ss:StyleID="data"><Data ss:Type="Number">19.826</Data></Cell><Cell ss:Index="12" ss:StyleID="data"><Data ss:Type="Number">18.936</Data></Cell><Cell ss:Index="13" ss:StyleID="data"><Data ss:Type="Number">17.717</Data></Cell><Cell ss:Index="14" ss:StyleID="data"><Data ss:Type="Number">17.578</Data></Cell><Cell ss:Index="15" ss:StyleID="data"><Data ss:Type="Number">18.111</Data></Cell><Cell ss:Index="16" ss:StyleID="data"><Data ss:Type="Number">17.96</Data></Cell><Cell ss:Index="17" ss:StyleID="data"><Data ss:Type="Number">17.412</Data></Cell></Row><Row><Cell ss:StyleID="vdimension"><Data ss:Type="String">1996</Data></Cell><Cell ss:Index="2" ss:StyleID="siblingmd"><Data ss:Type="String"></Data></Cell><Cell ss:Index="3" ss:StyleID="data2"><Data ss:Type="Number">15.848</Data></Cell><Cell ss:Index="4" ss:StyleID="data2"><Data ss:Type="Number">15.527</Data></Cell><Cell ss:Index="5" ss:StyleID="data2"><Data ss:Type="Number">15.911</Data></Cell><Cell ss:Index="6" ss:StyleID="data2"><Data ss:Type="Number">16.21</Data></Cell><Cell ss:Index="7" ss:StyleID="data2"><Data ss:Type="Number">15.844</Data></Cell><Cell ss:Index="8" ss:StyleID="data2"><Data ss:Type="Number">19.749</Data></Cell><Cell ss:Index="9" ss:StyleID="data2"><Data ss:Type="Number">19.862</Data></Cell><Cell ss:Index="10" ss:StyleID="data2"><Data ss:Type="Number">20.38</Data></Cell><Cell ss:Index="11" ss:StyleID="data2"><Data ss:Type="Number">20.096</Data></Cell><Cell ss:Index="12" ss:StyleID="data2"><Data ss:Type="Number">18.973</Data></Cell><Cell ss:Index="13" ss:StyleID="data2"><Data ss:Type="Number">17.86</Data></Cell><Cell ss:Index="14" ss:StyleID="data2"><Data ss:Type="Number">17.777</Data></Cell><Cell ss:Index="15" ss:StyleID="data2"><Data ss:Type="Number">18.221</Data></Cell><Cell ss:Index="16" ss:StyleID="data2"><Data ss:Type="Number">18.202</Data></Cell><Cell ss:Index="17" ss:StyleID="data2"><Data ss:Type="Number">17.453</Data></Cell></Row><Row><Cell ss:StyleID="vdimension"><Data ss:Type="String">1997</Data></Cell><Cell ss:Index="2" ss:StyleID="siblingmd"><Data ss:Type="String"></Data></Cell><Cell ss:Index="3" ss:StyleID="data"><Data ss:Type="Number">15.978</Data></Cell><Cell ss:Index="4" ss:StyleID="data"><Data ss:Type="Number">15.744</Data></Cell><Cell ss:Index="5" ss:StyleID="data"><Data ss:Type="Number">16.107</Data></Cell><Cell ss:Index="6" ss:StyleID="data"><Data ss:Type="Number">16.251</Data></Cell><Cell ss:Index="7" ss:StyleID="data"><Data ss:Type="Number">15.917</Data></Cell><Cell ss:Index="8" ss:StyleID="data"><Data ss:Type="Number">19.822</Data></Cell><Cell ss:Index="9" ss:StyleID="data"><Data ss:Type="Number">19.995</Data></Cell><Cell ss:Index="10" ss:StyleID="data"><Data ss:Type="Number">20.429</Data></Cell><Cell ss:Index="11" ss:StyleID="data"><Data ss:Type="Number">20.015</Data></Cell><Cell ss:Index="12" ss:StyleID="data"><Data ss:Type="Number">19.121</Data></Cell><Cell ss:Index="13" ss:StyleID="data"><Data ss:Type="Number">17.958</Data></Cell><Cell ss:Index="14" ss:StyleID="data"><Data ss:Type="Number">17.943</Data></Cell><Cell ss:Index="15" ss:StyleID="data"><Data ss:Type="Number">18.336</Data></Cell><Cell ss:Index="16" ss:StyleID="data"><Data ss:Type="Number">18.18</Data></Cell><Cell ss:Index="17" ss:StyleID="data"><Data ss:Type="Number">17.565</Data></Cell></Row><Row><Cell ss:StyleID="vdimension"><Data ss:Type="String">1998</Data></Cell><Cell ss:Index="2" ss:StyleID="siblingmd"><Data ss:Type="String"></Data></Cell><Cell ss:Index="3" ss:StyleID="data2"><Data ss:Type="Number">15.933</Data></Cell><Cell ss:Index="4" ss:StyleID="data2"><Data ss:Type="Number">15.724</Data></Cell><Cell ss:Index="5" ss:StyleID="data2"><Data ss:Type="Number">16.081</Data></Cell><Cell ss:Index="6" ss:StyleID="data2"><Data ss:Type="Number">16.15</Data></Cell><Cell ss:Index="7" ss:StyleID="data2"><Data ss:Type="Number">15.888</Data></Cell><Cell ss:Index="8" ss:StyleID="data2"><Data ss:Type="Number">19.82</Data></Cell><Cell ss:Index="9" ss:StyleID="data2"><Data ss:Type="Number">19.962</Data></Cell><Cell ss:Index="10" ss:StyleID="data2"><Data ss:Type="Number">20.505</Data></Cell><Cell ss:Index="11" ss:StyleID="data2"><Data ss:Type="Number">20.066</Data></Cell><Cell ss:Index="12" ss:StyleID="data2"><Data ss:Type="Number">19.066</Data></Cell><Cell ss:Index="13" ss:StyleID="data2"><Data ss:Type="Number">17.93</Data></Cell><Cell ss:Index="14" ss:StyleID="data2"><Data ss:Type="Number">17.91</Data></Cell><Cell ss:Index="15" ss:StyleID="data2"><Data ss:Type="Number">18.358</Data></Cell><Cell ss:Index="16" ss:StyleID="data2"><Data ss:Type="Number">18.152</Data></Cell><Cell ss:Index="17" ss:StyleID="data2"><Data ss:Type="Number">17.518</Data></Cell></Row><Row><Cell ss:StyleID="vdimension"><Data ss:Type="String">1999</Data></Cell><Cell ss:Index="2" ss:StyleID="siblingmd"><Data ss:Type="String"></Data></Cell><Cell ss:Index="3" ss:StyleID="data"><Data ss:Type="Number">16.183</Data></Cell><Cell ss:Index="4" ss:StyleID="data"><Data ss:Type="Number">15.881</Data></Cell><Cell ss:Index="5" ss:StyleID="data"><Data ss:Type="Number">16.383</Data></Cell><Cell ss:Index="6" ss:StyleID="data"><Data ss:Type="Number">16.425</Data></Cell><Cell ss:Index="7" ss:StyleID="data"><Data ss:Type="Number">16.179</Data></Cell><Cell ss:Index="8" ss:StyleID="data"><Data ss:Type="Number">20.038</Data></Cell><Cell ss:Index="9" ss:StyleID="data"><Data ss:Type="Number">20.13</Data></Cell><Cell ss:Index="10" ss:StyleID="data"><Data ss:Type="Number">20.687</Data></Cell><Cell ss:Index="11" ss:StyleID="data"><Data ss:Type="Number">20.245</Data></Cell><Cell ss:Index="12" ss:StyleID="data"><Data ss:Type="Number">19.385</Data></Cell><Cell ss:Index="13" ss:StyleID="data"><Data ss:Type="Number">18.161</Data></Cell><Cell ss:Index="14" ss:StyleID="data"><Data ss:Type="Number">18.069</Data></Cell><Cell ss:Index="15" ss:StyleID="data"><Data ss:Type="Number">18.596</Data></Cell><Cell ss:Index="16" ss:StyleID="data"><Data ss:Type="Number">18.38</Data></Cell><Cell ss:Index="17" ss:StyleID="data"><Data ss:Type="Number">17.821</Data></Cell></Row><Row><Cell ss:StyleID="vdimension"><Data ss:Type="String">2000</Data></Cell><Cell ss:Index="2" ss:StyleID="siblingmd"><Data ss:Type="String"></Data></Cell><Cell ss:Index="3" ss:StyleID="data2"><Data ss:Type="Number">16.535</Data></Cell><Cell ss:Index="4" ss:StyleID="data2"><Data ss:Type="Number">16.311</Data></Cell><Cell ss:Index="5" ss:StyleID="data2"><Data ss:Type="Number">16.745</Data></Cell><Cell ss:Index="6" ss:StyleID="data2"><Data ss:Type="Number">16.851</Data></Cell><Cell ss:Index="7" ss:StyleID="data2"><Data ss:Type="Number">16.4</Data></Cell><Cell ss:Index="8" ss:StyleID="data2"><Data ss:Type="Number">20.35</Data></Cell><Cell ss:Index="9" ss:StyleID="data2"><Data ss:Type="Number">20.508</Data></Cell><Cell ss:Index="10" ss:StyleID="data2"><Data ss:Type="Number">20.979</Data></Cell><Cell ss:Index="11" ss:StyleID="data2"><Data ss:Type="Number">20.605</Data></Cell><Cell ss:Index="12" ss:StyleID="data2"><Data ss:Type="Number">19.626</Data></Cell><Cell ss:Index="13" ss:StyleID="data2"><Data ss:Type="Number">18.486</Data></Cell><Cell ss:Index="14" ss:StyleID="data2"><Data ss:Type="Number">18.463</Data></Cell><Cell ss:Index="15" ss:StyleID="data2"><Data ss:Type="Number">18.913</Data></Cell><Cell ss:Index="16" ss:StyleID="data2"><Data ss:Type="Number">18.761</Data></Cell><Cell ss:Index="17" ss:StyleID="data2"><Data ss:Type="Number">18.048</Data></Cell></Row><Row><Cell ss:StyleID="vdimension"><Data ss:Type="String">2001</Data></Cell><Cell ss:Index="2" ss:StyleID="siblingmd"><Data ss:Type="String"></Data></Cell><Cell ss:Index="3" ss:StyleID="data"><Data ss:Type="Number">16.87</Data></Cell><Cell ss:Index="4" ss:StyleID="data"><Data ss:Type="Number">16.622</Data></Cell><Cell ss:Index="5" ss:StyleID="data"><Data ss:Type="Number">17.125</Data></Cell><Cell ss:Index="6" ss:StyleID="data"><Data ss:Type="Number">17.122</Data></Cell><Cell ss:Index="7" ss:StyleID="data"><Data ss:Type="Number">16.77</Data></Cell><Cell ss:Index="8" ss:StyleID="data"><Data ss:Type="Number">20.72</Data></Cell><Cell ss:Index="9" ss:StyleID="data"><Data ss:Type="Number">20.822</Data></Cell><Cell ss:Index="10" ss:StyleID="data"><Data ss:Type="Number">21.349</Data></Cell><Cell ss:Index="11" ss:StyleID="data"><Data ss:Type="Number">20.936</Data></Cell><Cell ss:Index="12" ss:StyleID="data"><Data ss:Type="Number">20.078</Data></Cell><Cell ss:Index="13" ss:StyleID="data"><Data ss:Type="Number">18.834</Data></Cell><Cell ss:Index="14" ss:StyleID="data"><Data ss:Type="Number">18.77</Data></Cell><Cell ss:Index="15" ss:StyleID="data"><Data ss:Type="Number">19.282</Data></Cell><Cell ss:Index="16" ss:StyleID="data"><Data ss:Type="Number">19.065</Data></Cell><Cell ss:Index="17" ss:StyleID="data"><Data ss:Type="Number">18.455</Data></Cell></Row><Row><Cell ss:StyleID="vdimension"><Data ss:Type="String">2002</Data></Cell><Cell ss:Index="2" ss:StyleID="siblingmd"><Data ss:Type="String"></Data></Cell><Cell ss:Index="3" ss:StyleID="data2"><Data ss:Type="Number">16.878</Data></Cell><Cell ss:Index="4" ss:StyleID="data2"><Data ss:Type="Number">16.672</Data></Cell><Cell ss:Index="5" ss:StyleID="data2"><Data ss:Type="Number">17.035</Data></Cell><Cell ss:Index="6" ss:StyleID="data2"><Data ss:Type="Number">17.163</Data></Cell><Cell ss:Index="7" ss:StyleID="data2"><Data ss:Type="Number">16.783</Data></Cell><Cell ss:Index="8" ss:StyleID="data2"><Data ss:Type="Number">20.784</Data></Cell><Cell ss:Index="9" ss:StyleID="data2"><Data ss:Type="Number">20.819</Data></Cell><Cell ss:Index="10" ss:StyleID="data2"><Data ss:Type="Number">21.428</Data></Cell><Cell ss:Index="11" ss:StyleID="data2"><Data ss:Type="Number">20.969</Data></Cell><Cell ss:Index="12" ss:StyleID="data2"><Data ss:Type="Number">20.214</Data></Cell><Cell ss:Index="13" ss:StyleID="data2"><Data ss:Type="Number">18.868</Data></Cell><Cell ss:Index="14" ss:StyleID="data2"><Data ss:Type="Number">18.789</Data></Cell><Cell ss:Index="15" ss:StyleID="data2"><Data ss:Type="Number">19.274</Data></Cell><Cell ss:Index="16" ss:StyleID="data2"><Data ss:Type="Number">19.096</Data></Cell><Cell ss:Index="17" ss:StyleID="data2"><Data ss:Type="Number">18.531</Data></Cell></Row><Row><Cell ss:StyleID="vdimension"><Data ss:Type="String">2003</Data></Cell><Cell ss:Index="2" ss:StyleID="siblingmd"><Data ss:Type="String"></Data></Cell><Cell ss:Index="3" ss:StyleID="data"><Data ss:Type="Number">16.77</Data></Cell><Cell ss:Index="4" ss:StyleID="data"><Data ss:Type="Number">16.536</Data></Cell><Cell ss:Index="5" ss:StyleID="data"><Data ss:Type="Number">16.977</Data></Cell><Cell ss:Index="6" ss:StyleID="data"><Data ss:Type="Number">17.037</Data></Cell><Cell ss:Index="7" ss:StyleID="data"><Data ss:Type="Number">16.678</Data></Cell><Cell ss:Index="8" ss:StyleID="data"><Data ss:Type="Number">20.512</Data></Cell><Cell ss:Index="9" ss:StyleID="data"><Data ss:Type="Number">20.57</Data></Cell><Cell ss:Index="10" ss:StyleID="data"><Data ss:Type="Number">21.152</Data></Cell><Cell ss:Index="11" ss:StyleID="data"><Data ss:Type="Number">20.688</Data></Cell><Cell ss:Index="12" ss:StyleID="data"><Data ss:Type="Number">19.937</Data></Cell><Cell ss:Index="13" ss:StyleID="data"><Data ss:Type="Number">18.676</Data></Cell><Cell ss:Index="14" ss:StyleID="data"><Data ss:Type="Number">18.596</Data></Cell><Cell ss:Index="15" ss:StyleID="data"><Data ss:Type="Number">19.103</Data></Cell><Cell ss:Index="16" ss:StyleID="data"><Data ss:Type="Number">18.891</Data></Cell><Cell ss:Index="17" ss:StyleID="data"><Data ss:Type="Number">18.339</Data></Cell></Row><Row><Cell ss:StyleID="vdimension"><Data ss:Type="String">2004</Data></Cell><Cell ss:Index="2" ss:StyleID="siblingmd"><Data ss:Type="String"></Data></Cell><Cell ss:Index="3" ss:StyleID="data2"><Data ss:Type="Number">17.343</Data></Cell><Cell ss:Index="4" ss:StyleID="data2"><Data ss:Type="Number">17.2</Data></Cell><Cell ss:Index="5" ss:StyleID="data2"><Data ss:Type="Number">17.483</Data></Cell><Cell ss:Index="6" ss:StyleID="data2"><Data ss:Type="Number">17.542</Data></Cell><Cell ss:Index="7" ss:StyleID="data2"><Data ss:Type="Number">17.263</Data></Cell><Cell ss:Index="8" ss:StyleID="data2"><Data ss:Type="Number">21.258</Data></Cell><Cell ss:Index="9" ss:StyleID="data2"><Data ss:Type="Number">21.482</Data></Cell><Cell ss:Index="10" ss:StyleID="data2"><Data ss:Type="Number">21.731</Data></Cell><Cell ss:Index="11" ss:StyleID="data2"><Data ss:Type="Number">21.362</Data></Cell><Cell ss:Index="12" ss:StyleID="data2"><Data ss:Type="Number">20.679</Data></Cell><Cell ss:Index="13" ss:StyleID="data2"><Data ss:Type="Number">19.332</Data></Cell><Cell ss:Index="14" ss:StyleID="data2"><Data ss:Type="Number">19.379</Data></Cell><Cell ss:Index="15" ss:StyleID="data2"><Data ss:Type="Number">19.638</Data></Cell><Cell ss:Index="16" ss:StyleID="data2"><Data ss:Type="Number">19.477</Data></Cell><Cell ss:Index="17" ss:StyleID="data2"><Data ss:Type="Number">19.001</Data></Cell></Row><Row><Cell ss:StyleID="vdimension"><Data ss:Type="String">2005</Data></Cell><Cell ss:Index="2" ss:StyleID="siblingmd"><Data ss:Type="String"></Data></Cell><Cell ss:Index="3" ss:StyleID="data"><Data ss:Type="Number">17.37</Data></Cell><Cell ss:Index="4" ss:StyleID="data"><Data ss:Type="Number">17.285</Data></Cell><Cell ss:Index="5" ss:StyleID="data"><Data ss:Type="Number">17.659</Data></Cell><Cell ss:Index="6" ss:StyleID="data"><Data ss:Type="Number">17.608</Data></Cell><Cell ss:Index="7" ss:StyleID="data"><Data ss:Type="Number">17.125</Data></Cell><Cell ss:Index="8" ss:StyleID="data"><Data ss:Type="Number">21.127</Data></Cell><Cell ss:Index="9" ss:StyleID="data"><Data ss:Type="Number">21.306</Data></Cell><Cell ss:Index="10" ss:StyleID="data"><Data ss:Type="Number">21.703</Data></Cell><Cell ss:Index="11" ss:StyleID="data"><Data ss:Type="Number">21.298</Data></Cell><Cell ss:Index="12" ss:StyleID="data"><Data ss:Type="Number">20.473</Data></Cell><Cell ss:Index="13" ss:StyleID="data"><Data ss:Type="Number">19.276</Data></Cell><Cell ss:Index="14" ss:StyleID="data"><Data ss:Type="Number">19.328</Data></Cell><Cell ss:Index="15" ss:StyleID="data"><Data ss:Type="Number">19.71</Data></Cell><Cell ss:Index="16" ss:StyleID="data"><Data ss:Type="Number">19.474</Data></Cell><Cell ss:Index="17" ss:StyleID="data"><Data ss:Type="Number">18.828</Data></Cell></Row><Row><Cell ss:StyleID="vdimension"><Data ss:Type="String">2006</Data></Cell><Cell ss:Index="2" ss:StyleID="siblingmd"><Data ss:Type="String"></Data></Cell><Cell ss:Index="3" ss:StyleID="data2"><Data ss:Type="Number">17.687</Data></Cell><Cell ss:Index="4" ss:StyleID="data2"><Data ss:Type="Number">17.582</Data></Cell><Cell ss:Index="5" ss:StyleID="data2"><Data ss:Type="Number">17.93</Data></Cell><Cell ss:Index="6" ss:StyleID="data2"><Data ss:Type="Number">17.941</Data></Cell><Cell ss:Index="7" ss:StyleID="data2"><Data ss:Type="Number">17.483</Data></Cell><Cell ss:Index="8" ss:StyleID="data2"><Data ss:Type="Number">21.418</Data></Cell><Cell ss:Index="9" ss:StyleID="data2"><Data ss:Type="Number">21.53</Data></Cell><Cell ss:Index="10" ss:StyleID="data2"><Data ss:Type="Number">21.98</Data></Cell><Cell ss:Index="11" ss:StyleID="data2"><Data ss:Type="Number">21.615</Data></Cell><Cell ss:Index="12" ss:StyleID="data2"><Data ss:Type="Number">20.823</Data></Cell><Cell ss:Index="13" ss:StyleID="data2"><Data ss:Type="Number">19.579</Data></Cell><Cell ss:Index="14" ss:StyleID="data2"><Data ss:Type="Number">19.586</Data></Cell><Cell ss:Index="15" ss:StyleID="data2"><Data ss:Type="Number">19.978</Data></Cell><Cell ss:Index="16" ss:StyleID="data2"><Data ss:Type="Number">19.8</Data></Cell><Cell ss:Index="17" ss:StyleID="data2"><Data ss:Type="Number">19.18</Data></Cell></Row><Row><Cell ss:StyleID="vdimension"><Data ss:Type="String">2007</Data></Cell><Cell ss:Index="2" ss:StyleID="siblingmd"><Data ss:Type="String"></Data></Cell><Cell ss:Index="3" ss:StyleID="data"><Data ss:Type="Number">17.763</Data></Cell><Cell ss:Index="4" ss:StyleID="data"><Data ss:Type="Number">17.738</Data></Cell><Cell ss:Index="5" ss:StyleID="data"><Data ss:Type="Number">18.074</Data></Cell><Cell ss:Index="6" ss:StyleID="data"><Data ss:Type="Number">17.98</Data></Cell><Cell ss:Index="7" ss:StyleID="data"><Data ss:Type="Number">17.467</Data></Cell><Cell ss:Index="8" ss:StyleID="data"><Data ss:Type="Number">21.405</Data></Cell><Cell ss:Index="9" ss:StyleID="data"><Data ss:Type="Number">21.675</Data></Cell><Cell ss:Index="10" ss:StyleID="data"><Data ss:Type="Number">21.952</Data></Cell><Cell ss:Index="11" ss:StyleID="data"><Data ss:Type="Number">21.629</Data></Cell><Cell ss:Index="12" ss:StyleID="data"><Data ss:Type="Number">20.681</Data></Cell><Cell ss:Index="13" ss:StyleID="data"><Data ss:Type="Number">19.607</Data></Cell><Cell ss:Index="14" ss:StyleID="data"><Data ss:Type="Number">19.73</Data></Cell><Cell ss:Index="15" ss:StyleID="data"><Data ss:Type="Number">20.032</Data></Cell><Cell ss:Index="16" ss:StyleID="data"><Data ss:Type="Number">19.823</Data></Cell><Cell ss:Index="17" ss:StyleID="data"><Data ss:Type="Number">19.098</Data></Cell></Row><Row><Cell ss:StyleID="vdimension"><Data ss:Type="String">2008</Data></Cell><Cell ss:Index="2" ss:StyleID="siblingmd"><Data ss:Type="String"></Data></Cell><Cell ss:Index="3" ss:StyleID="data2"><Data ss:Type="Number">17.804</Data></Cell><Cell ss:Index="4" ss:StyleID="data2"><Data ss:Type="Number">17.712</Data></Cell><Cell ss:Index="5" ss:StyleID="data2"><Data ss:Type="Number">18.054</Data></Cell><Cell ss:Index="6" ss:StyleID="data2"><Data ss:Type="Number">18.054</Data></Cell><Cell ss:Index="7" ss:StyleID="data2"><Data ss:Type="Number">17.591</Data></Cell><Cell ss:Index="8" ss:StyleID="data2"><Data ss:Type="Number">21.398</Data></Cell><Cell ss:Index="9" ss:StyleID="data2"><Data ss:Type="Number">21.507</Data></Cell><Cell ss:Index="10" ss:StyleID="data2"><Data ss:Type="Number">21.952</Data></Cell><Cell ss:Index="11" ss:StyleID="data2"><Data ss:Type="Number">21.518</Data></Cell><Cell ss:Index="12" ss:StyleID="data2"><Data ss:Type="Number">20.885</Data></Cell><Cell ss:Index="13" ss:StyleID="data2"><Data ss:Type="Number">19.622</Data></Cell><Cell ss:Index="14" ss:StyleID="data2"><Data ss:Type="Number">19.63</Data></Cell><Cell ss:Index="15" ss:StyleID="data2"><Data ss:Type="Number">20.025</Data></Cell><Cell ss:Index="16" ss:StyleID="data2"><Data ss:Type="Number">19.802</Data></Cell><Cell ss:Index="17" ss:StyleID="data2"><Data ss:Type="Number">19.259</Data></Cell></Row><Row><Cell ss:StyleID="vdimension"><Data ss:Type="String">2009</Data></Cell><Cell ss:Index="2" ss:StyleID="siblingmd"><Data ss:Type="String"></Data></Cell><Cell ss:Index="3" ss:StyleID="data"><Data ss:Type="Number">17.933</Data></Cell><Cell ss:Index="4" ss:StyleID="data"><Data ss:Type="Number">17.895</Data></Cell><Cell ss:Index="5" ss:StyleID="data"><Data ss:Type="Number">18.252</Data></Cell><Cell ss:Index="6" ss:StyleID="data"><Data ss:Type="Number">18.174</Data></Cell><Cell ss:Index="7" ss:StyleID="data"><Data ss:Type="Number">17.626</Data></Cell><Cell ss:Index="8" ss:StyleID="data"><Data ss:Type="Number">21.469</Data></Cell><Cell ss:Index="9" ss:StyleID="data"><Data ss:Type="Number">21.628</Data></Cell><Cell ss:Index="10" ss:StyleID="data"><Data ss:Type="Number">22.065</Data></Cell><Cell ss:Index="11" ss:StyleID="data"><Data ss:Type="Number">21.611</Data></Cell><Cell ss:Index="12" ss:StyleID="data"><Data ss:Type="Number">20.848</Data></Cell><Cell ss:Index="13" ss:StyleID="data"><Data ss:Type="Number">19.719</Data></Cell><Cell ss:Index="14" ss:StyleID="data"><Data ss:Type="Number">19.783</Data></Cell><Cell ss:Index="15" ss:StyleID="data"><Data ss:Type="Number">20.174</Data></Cell><Cell ss:Index="16" ss:StyleID="data"><Data ss:Type="Number">19.905</Data></Cell><Cell ss:Index="17" ss:StyleID="data"><Data ss:Type="Number">19.258</Data></Cell></Row><Row><Cell ss:StyleID="vdimension"><Data ss:Type="String">2010</Data></Cell><Cell ss:Index="2" ss:StyleID="siblingmd"><Data ss:Type="String"></Data></Cell><Cell ss:Index="3" ss:StyleID="data2"><Data ss:Type="Number">18.172</Data></Cell><Cell ss:Index="4" ss:StyleID="data2"><Data ss:Type="Number">18.13</Data></Cell><Cell ss:Index="5" ss:StyleID="data2"><Data ss:Type="Number">18.429</Data></Cell><Cell ss:Index="6" ss:StyleID="data2"><Data ss:Type="Number">18.356</Data></Cell><Cell ss:Index="7" ss:StyleID="data2"><Data ss:Type="Number">17.924</Data></Cell><Cell ss:Index="8" ss:StyleID="data2"><Data ss:Type="Number">21.72</Data></Cell><Cell ss:Index="9" ss:StyleID="data2"><Data ss:Type="Number">21.846</Data></Cell><Cell ss:Index="10" ss:StyleID="data2"><Data ss:Type="Number">22.242</Data></Cell><Cell ss:Index="11" ss:StyleID="data2"><Data ss:Type="Number">21.867</Data></Cell><Cell ss:Index="12" ss:StyleID="data2"><Data ss:Type="Number">21.185</Data></Cell><Cell ss:Index="13" ss:StyleID="data2"><Data ss:Type="Number">19.962</Data></Cell><Cell ss:Index="14" ss:StyleID="data2"><Data ss:Type="Number">20.004</Data></Cell><Cell ss:Index="15" ss:StyleID="data2"><Data ss:Type="Number">20.349</Data></Cell><Cell ss:Index="16" ss:StyleID="data2"><Data ss:Type="Number">20.126</Data></Cell><Cell ss:Index="17" ss:StyleID="data2"><Data ss:Type="Number">19.572</Data></Cell></Row><Row><Cell ss:StyleID="vdimension"><Data ss:Type="String">2011</Data></Cell><Cell ss:Index="2" ss:StyleID="siblingmd"><Data ss:Type="String"></Data></Cell><Cell ss:Index="3" ss:StyleID="data"><Data ss:Type="Number">18.329</Data></Cell><Cell ss:Index="4" ss:StyleID="data"><Data ss:Type="Number">18.395</Data></Cell><Cell ss:Index="5" ss:StyleID="data"><Data ss:Type="Number">18.684</Data></Cell><Cell ss:Index="6" ss:StyleID="data"><Data ss:Type="Number">18.532</Data></Cell><Cell ss:Index="7" ss:StyleID="data"><Data ss:Type="Number">17.929</Data></Cell><Cell ss:Index="8" ss:StyleID="data"><Data ss:Type="Number">21.816</Data></Cell><Cell ss:Index="9" ss:StyleID="data"><Data ss:Type="Number">22.086</Data></Cell><Cell ss:Index="10" ss:StyleID="data"><Data ss:Type="Number">22.357</Data></Cell><Cell ss:Index="11" ss:StyleID="data"><Data ss:Type="Number">21.938</Data></Cell><Cell ss:Index="12" ss:StyleID="data"><Data ss:Type="Number">21.164</Data></Cell><Cell ss:Index="13" ss:StyleID="data"><Data ss:Type="Number">20.085</Data></Cell><Cell ss:Index="14" ss:StyleID="data"><Data ss:Type="Number">20.253</Data></Cell><Cell ss:Index="15" ss:StyleID="data"><Data ss:Type="Number">20.528</Data></Cell><Cell ss:Index="16" ss:StyleID="data"><Data ss:Type="Number">20.245</Data></Cell><Cell ss:Index="17" ss:StyleID="data"><Data ss:Type="Number">19.564</Data></Cell></Row><Row><Cell ss:StyleID="vdimension"><Data ss:Type="String">2012</Data></Cell><Cell ss:Index="2" ss:StyleID="siblingmd"><Data ss:Type="String"></Data></Cell><Cell ss:Index="3" ss:StyleID="data2"><Data ss:Type="Number">18.327</Data></Cell><Cell ss:Index="4" ss:StyleID="data2"><Data ss:Type="Number">18.318</Data></Cell><Cell ss:Index="5" ss:StyleID="data2"><Data ss:Type="Number">18.643</Data></Cell><Cell ss:Index="6" ss:StyleID="data2"><Data ss:Type="Number">18.5</Data></Cell><Cell ss:Index="7" ss:StyleID="data2"><Data ss:Type="Number">18.028</Data></Cell><Cell ss:Index="8" ss:StyleID="data2"><Data ss:Type="Number">21.783</Data></Cell><Cell ss:Index="9" ss:StyleID="data2"><Data ss:Type="Number">22.009</Data></Cell><Cell ss:Index="10" ss:StyleID="data2"><Data ss:Type="Number">22.28</Data></Cell><Cell ss:Index="11" ss:StyleID="data2"><Data ss:Type="Number">21.838</Data></Cell><Cell ss:Index="12" ss:StyleID="data2"><Data ss:Type="Number">21.225</Data></Cell><Cell ss:Index="13" ss:StyleID="data2"><Data ss:Type="Number">20.067</Data></Cell><Cell ss:Index="14" ss:StyleID="data2"><Data ss:Type="Number">20.173</Data></Cell><Cell ss:Index="15" ss:StyleID="data2"><Data ss:Type="Number">20.473</Data></Cell><Cell ss:Index="16" ss:StyleID="data2"><Data ss:Type="Number">20.18</Data></Cell><Cell ss:Index="17" ss:StyleID="data2"><Data ss:Type="Number">19.641</Data></Cell></Row><Row><Cell ss:StyleID="vdimension"><Data ss:Type="String">2013</Data></Cell><Cell ss:Index="2" ss:StyleID="siblingmd"><Data ss:Type="String"></Data></Cell><Cell ss:Index="3" ss:StyleID="data"><Data ss:Type="Number">18.556</Data></Cell><Cell ss:Index="4" ss:StyleID="data"><Data ss:Type="Number">18.584</Data></Cell><Cell ss:Index="5" ss:StyleID="data"><Data ss:Type="Number">18.829</Data></Cell><Cell ss:Index="6" ss:StyleID="data"><Data ss:Type="Number">18.714</Data></Cell><Cell ss:Index="7" ss:StyleID="data"><Data ss:Type="Number">18.241</Data></Cell><Cell ss:Index="8" ss:StyleID="data"><Data ss:Type="Number">22.014</Data></Cell><Cell ss:Index="9" ss:StyleID="data"><Data ss:Type="Number">22.186</Data></Cell><Cell ss:Index="10" ss:StyleID="data"><Data ss:Type="Number">22.456</Data></Cell><Cell ss:Index="11" ss:StyleID="data"><Data ss:Type="Number">22.127</Data></Cell><Cell ss:Index="12" ss:StyleID="data"><Data ss:Type="Number">21.475</Data></Cell><Cell ss:Index="13" ss:StyleID="data"><Data ss:Type="Number">20.296</Data></Cell><Cell ss:Index="14" ss:StyleID="data"><Data ss:Type="Number">20.394</Data></Cell><Cell ss:Index="15" ss:StyleID="data"><Data ss:Type="Number">20.649</Data></Cell><Cell ss:Index="16" ss:StyleID="data"><Data ss:Type="Number">20.429</Data></Cell><Cell ss:Index="17" ss:StyleID="data"><Data ss:Type="Number">19.872</Data></Cell></Row><Row><Cell ss:StyleID="vdimension"><Data ss:Type="String">2014</Data></Cell><Cell ss:Index="2" ss:StyleID="siblingmd"><Data ss:Type="String"></Data></Cell><Cell ss:Index="3" ss:StyleID="data2"><Data ss:Type="Number">18.906</Data></Cell><Cell ss:Index="4" ss:StyleID="data2"><Data ss:Type="Number">19.009</Data></Cell><Cell ss:Index="5" ss:StyleID="data2"><Data ss:Type="Number">19.237</Data></Cell><Cell ss:Index="6" ss:StyleID="data2"><Data ss:Type="Number">19.108</Data></Cell><Cell ss:Index="7" ss:StyleID="data2"><Data ss:Type="Number">18.472</Data></Cell><Cell ss:Index="8" ss:StyleID="data2"><Data ss:Type="Number">22.309</Data></Cell><Cell ss:Index="9" ss:StyleID="data2"><Data ss:Type="Number">22.556</Data></Cell><Cell ss:Index="10" ss:StyleID="data2"><Data ss:Type="Number">22.761</Data></Cell><Cell ss:Index="11" ss:StyleID="data2"><Data ss:Type="Number">22.496</Data></Cell><Cell ss:Index="12" ss:StyleID="data2"><Data ss:Type="Number">21.706</Data></Cell><Cell ss:Index="13" ss:StyleID="data2"><Data ss:Type="Number">20.615</Data></Cell><Cell ss:Index="14" ss:StyleID="data2"><Data ss:Type="Number">20.788</Data></Cell><Cell ss:Index="15" ss:StyleID="data2"><Data ss:Type="Number">21.003</Data></Cell><Cell ss:Index="16" ss:StyleID="data2"><Data ss:Type="Number">20.808</Data></Cell><Cell ss:Index="17" ss:StyleID="data2"><Data ss:Type="Number">20.101</Data></Cell></Row><Row><Cell ss:StyleID="vdimension"><Data ss:Type="String">2015</Data></Cell><Cell ss:Index="2" ss:StyleID="siblingmd"><Data ss:Type="String"></Data></Cell><Cell ss:Index="3" ss:StyleID="data"><Data ss:Type="Number">18.705</Data></Cell><Cell ss:Index="4" ss:StyleID="data"><Data ss:Type="Number">18.731</Data></Cell><Cell ss:Index="5" ss:StyleID="data"><Data ss:Type="Number">19.067</Data></Cell><Cell ss:Index="6" ss:StyleID="data"><Data ss:Type="Number">18.929</Data></Cell><Cell ss:Index="7" ss:StyleID="data"><Data ss:Type="Number">18.31</Data></Cell><Cell ss:Index="8" ss:StyleID="data"><Data ss:Type="Number">21.918</Data></Cell><Cell ss:Index="9" ss:StyleID="data"><Data ss:Type="Number">22.065</Data></Cell><Cell ss:Index="10" ss:StyleID="data"><Data ss:Type="Number">22.356</Data></Cell><Cell ss:Index="11" ss:StyleID="data"><Data ss:Type="Number">22.151</Data></Cell><Cell ss:Index="12" ss:StyleID="data"><Data ss:Type="Number">21.329</Data></Cell><Cell ss:Index="13" ss:StyleID="data"><Data ss:Type="Number">20.318</Data></Cell><Cell ss:Index="14" ss:StyleID="data"><Data ss:Type="Number">20.403</Data></Cell><Cell ss:Index="15" ss:StyleID="data"><Data ss:Type="Number">20.715</Data></Cell><Cell ss:Index="16" ss:StyleID="data"><Data ss:Type="Number">20.545</Data></Cell><Cell ss:Index="17" ss:StyleID="data"><Data ss:Type="Number">19.829</Data></Cell></Row><Row><Cell ss:StyleID="vdimension"><Data ss:Type="String">2016</Data></Cell><Cell ss:Index="2" ss:StyleID="siblingmd"><Data ss:Type="String"></Data></Cell><Cell ss:Index="3" ss:StyleID="data2"><Data ss:Type="Number">19.093</Data></Cell><Cell ss:Index="4" ss:StyleID="data2"><Data ss:Type="Number">19.117</Data></Cell><Cell ss:Index="5" ss:StyleID="data2"><Data ss:Type="Number">19.404</Data></Cell><Cell ss:Index="6" ss:StyleID="data2"><Data ss:Type="Number">19.326</Data></Cell><Cell ss:Index="7" ss:StyleID="data2"><Data ss:Type="Number">18.734</Data></Cell><Cell ss:Index="8" ss:StyleID="data2"><Data ss:Type="Number">22.341</Data></Cell><Cell ss:Index="9" ss:StyleID="data2"><Data ss:Type="Number">22.547</Data></Cell><Cell ss:Index="10" ss:StyleID="data2"><Data ss:Type="Number">22.706</Data></Cell><Cell ss:Index="11" ss:StyleID="data2"><Data ss:Type="Number">22.509</Data></Cell><Cell ss:Index="12" ss:StyleID="data2"><Data ss:Type="Number">21.809</Data></Cell><Cell ss:Index="13" ss:StyleID="data2"><Data ss:Type="Number">20.721</Data></Cell><Cell ss:Index="14" ss:StyleID="data2"><Data ss:Type="Number">20.834</Data></Cell><Cell ss:Index="15" ss:StyleID="data2"><Data ss:Type="Number">21.058</Data></Cell><Cell ss:Index="16" ss:StyleID="data2"><Data ss:Type="Number">20.92</Data></Cell><Cell ss:Index="17" ss:StyleID="data2"><Data ss:Type="Number">20.28</Data></Cell></Row><Row><Cell ss:StyleID="vdimension"><Data ss:Type="String">2017</Data></Cell><Cell ss:Index="2" ss:StyleID="siblingmd"><Data ss:Type="String"></Data></Cell><Cell ss:Index="3" ss:StyleID="data"><Data ss:Type="Number">19.018</Data></Cell><Cell ss:Index="4" ss:StyleID="data"><Data ss:Type="Number">19.136</Data></Cell><Cell ss:Index="5" ss:StyleID="data"><Data ss:Type="Number">19.405</Data></Cell><Cell ss:Index="6" ss:StyleID="data"><Data ss:Type="Number">19.226</Data></Cell><Cell ss:Index="7" ss:StyleID="data"><Data ss:Type="Number">18.524</Data></Cell><Cell ss:Index="8" ss:StyleID="data"><Data ss:Type="Number">22.168</Data></Cell><Cell ss:Index="9" ss:StyleID="data"><Data ss:Type="Number">22.414</Data></Cell><Cell ss:Index="10" ss:StyleID="data"><Data ss:Type="Number">22.67</Data></Cell><Cell ss:Index="11" ss:StyleID="data"><Data ss:Type="Number">22.311</Data></Cell><Cell ss:Index="12" ss:StyleID="data"><Data ss:Type="Number">21.562</Data></Cell><Cell ss:Index="13" ss:StyleID="data"><Data ss:Type="Number">20.596</Data></Cell><Cell ss:Index="14" ss:StyleID="data"><Data ss:Type="Number">20.775</Data></Cell><Cell ss:Index="15" ss:StyleID="data"><Data ss:Type="Number">21.038</Data></Cell><Cell ss:Index="16" ss:StyleID="data"><Data ss:Type="Number">20.769</Data></Cell><Cell ss:Index="17" ss:StyleID="data"><Data ss:Type="Number">20.052</Data></Cell></Row><Row><Cell ss:StyleID="vdimension"><Data ss:Type="String">2018</Data></Cell><Cell ss:Index="2" ss:StyleID="siblingmd"><Data ss:Type="String"></Data></Cell><Cell ss:Index="3" ss:StyleID="data2"><Data ss:Type="Number">19.321</Data></Cell><Cell ss:Index="4" ss:StyleID="data2"><Data ss:Type="Number">19.246</Data></Cell><Cell ss:Index="5" ss:StyleID="data2"><Data ss:Type="Number">19.697</Data></Cell><Cell ss:Index="6" ss:StyleID="data2"><Data ss:Type="Number">19.623</Data></Cell><Cell ss:Index="7" ss:StyleID="data2"><Data ss:Type="Number">18.945</Data></Cell><Cell ss:Index="8" ss:StyleID="data2"><Data ss:Type="Number">22.455</Data></Cell><Cell ss:Index="9" ss:StyleID="data2"><Data ss:Type="Number">22.553</Data></Cell><Cell ss:Index="10" ss:StyleID="data2"><Data ss:Type="Number">22.838</Data></Cell><Cell ss:Index="11" ss:StyleID="data2"><Data ss:Type="Number">22.685</Data></Cell><Cell ss:Index="12" ss:StyleID="data2"><Data ss:Type="Number">21.967</Data></Cell><Cell ss:Index="13" ss:StyleID="data2"><Data ss:Type="Number">20.889</Data></Cell><Cell ss:Index="14" ss:StyleID="data2"><Data ss:Type="Number">20.9</Data></Cell><Cell ss:Index="15" ss:StyleID="data2"><Data ss:Type="Number">21.267</Data></Cell><Cell ss:Index="16" ss:StyleID="data2"><Data ss:Type="Number">21.153</Data></Cell><Cell ss:Index="17" ss:StyleID="data2"><Data ss:Type="Number">20.462</Data></Cell></Row><Row><Cell ss:StyleID="vdimension"><Data ss:Type="String">2019</Data></Cell><Cell ss:Index="2" ss:StyleID="siblingmd"><Data ss:Type="String"></Data></Cell><Cell ss:Index="3" ss:StyleID="data"><Data ss:Type="Number">19.49</Data></Cell><Cell ss:Index="4" ss:StyleID="data"><Data ss:Type="Number">19.472</Data></Cell><Cell ss:Index="5" ss:StyleID="data"><Data ss:Type="Number">19.841</Data></Cell><Cell ss:Index="6" ss:StyleID="data"><Data ss:Type="Number">19.793</Data></Cell><Cell ss:Index="7" ss:StyleID="data"><Data ss:Type="Number">19.087</Data></Cell><Cell ss:Index="8" ss:StyleID="data"><Data ss:Type="Number">22.613</Data></Cell><Cell ss:Index="9" ss:StyleID="data"><Data ss:Type="Number">22.77</Data></Cell><Cell ss:Index="10" ss:StyleID="data"><Data ss:Type="Number">23.004</Data></Cell><Cell ss:Index="11" ss:StyleID="data"><Data ss:Type="Number">22.858</Data></Cell><Cell ss:Index="12" ss:StyleID="data"><Data ss:Type="Number">22.059</Data></Cell><Cell ss:Index="13" ss:StyleID="data"><Data ss:Type="Number">21.052</Data></Cell><Cell ss:Index="14" ss:StyleID="data"><Data ss:Type="Number">21.12</Data></Cell><Cell ss:Index="15" ss:StyleID="data"><Data ss:Type="Number">21.42</Data></Cell><Cell ss:Index="16" ss:StyleID="data"><Data ss:Type="Number">21.324</Data></Cell><Cell ss:Index="17" ss:StyleID="data"><Data ss:Type="Number">20.577</Data></Cell></Row><Row><Cell ss:StyleID="extractionwithlink" ss:HRef="http://dativ7a.istat.it/" x:HRefScreenTip="Click once to display linked information. Click and hold to select this cell."><Data ss:Type="String">Dati estratti il 08 dic 2020, 18h24 UTC (GMT) da I.Stat</Data></Cell></Row></Table><WorksheetOptions xmlns="urn:schemas-microsoft-com:office:excel"><Print xmlns="urn:schemas-microsoft-com:office:excel"><ValidPrinterInfo /><VerticalResolution>0</VerticalResolution></Print><Selected xmlns="urn:schemas-microsoft-com:office:excel" /><DoNotDisplayGridlines xmlns="urn:schemas-microsoft-com:office:excel" /><ProtectObjects xmlns="urn:schemas-microsoft-com:office:excel">False</ProtectObjects><ProtectScenarios xmlns="urn:schemas-microsoft-com:office:excel">False</ProtectScenarios></WorksheetOptions></Worksheet></Workbook>
